# Supplementary material for: A thermodynamically consistent monte carlo cross-bridge model with a trapping mechanism reveals the role of stretch activation in heart pumping
Source: Frontiers journal article supplement (doi:10.3389/fphys.2022.855303), 2022-09-08
Supplement: Data_Sheet_1.PDF [file Data_Sheet_1.PDF]

## Supplementary Material

# A Thermodynamically Consistent Monte Carlo Cross-Bridge Model with a Trapping Mechanism Reveals the Role of Stretch Activation in Heart Pumping

Kazunori Yoneda<sup>1</sup>, Ryo Kanada<sup>2</sup>, Jun-ichi Okada<sup>3,4</sup>, Masahiro Watanabe<sup>1</sup>, Seiryō Sugiura<sup>3</sup>, Toshiaki Hisada<sup>3</sup>, Takumi Washio<sup>3,4\*</sup>

<sup>1</sup> Section Solutions Division, Healthcare Solutions Development Unit, Fujitsu Japan Limited, Shiodome City Center, 1-5-2 Higashi-Shimbashi, Minato-ku, Tokyo 105-7123, Japan.

<sup>2</sup> RIKEN Center for Computational Science HPC- and AI-driven Drug Development Platform Division, AI-driven Drug Discovery Collaborative Unit, Kobe 654-0047, Japan.

<sup>3</sup> UT-Heart Inc., Kashiwanoha Campus Satellite, 178-4-4 Wakashiba, Kashiwa, Chiba 277-0871, Japan.

<sup>4</sup> Graduate school for frontier sciences, University of Tokyo, Kashiwanoha Campus Satellite, 178-4-4 Wakashiba, Kashiwa, Chiba 277-0871, Japan.

### \* Correspondence:

Takumi Washio  
washio@ut-heart.com

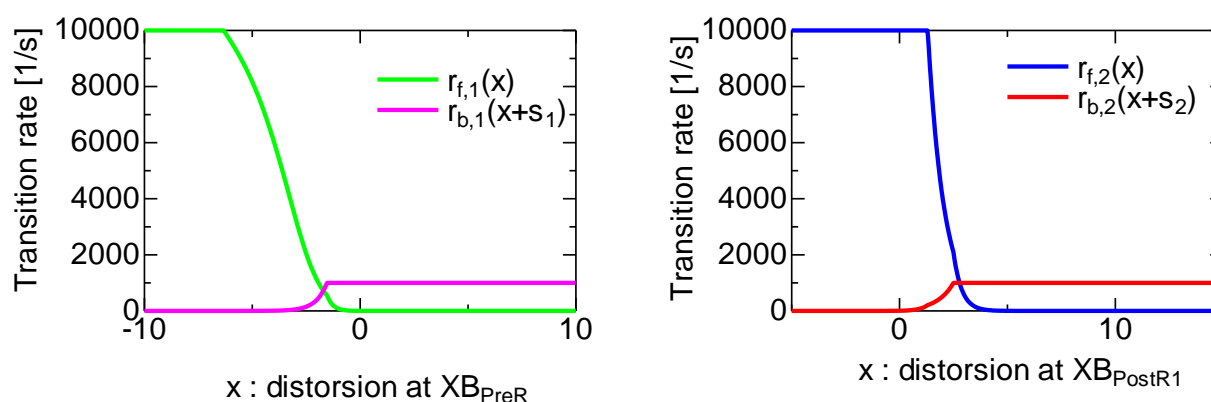

**Figure S1** Rate Constants of the power strokes and the reverse strokes

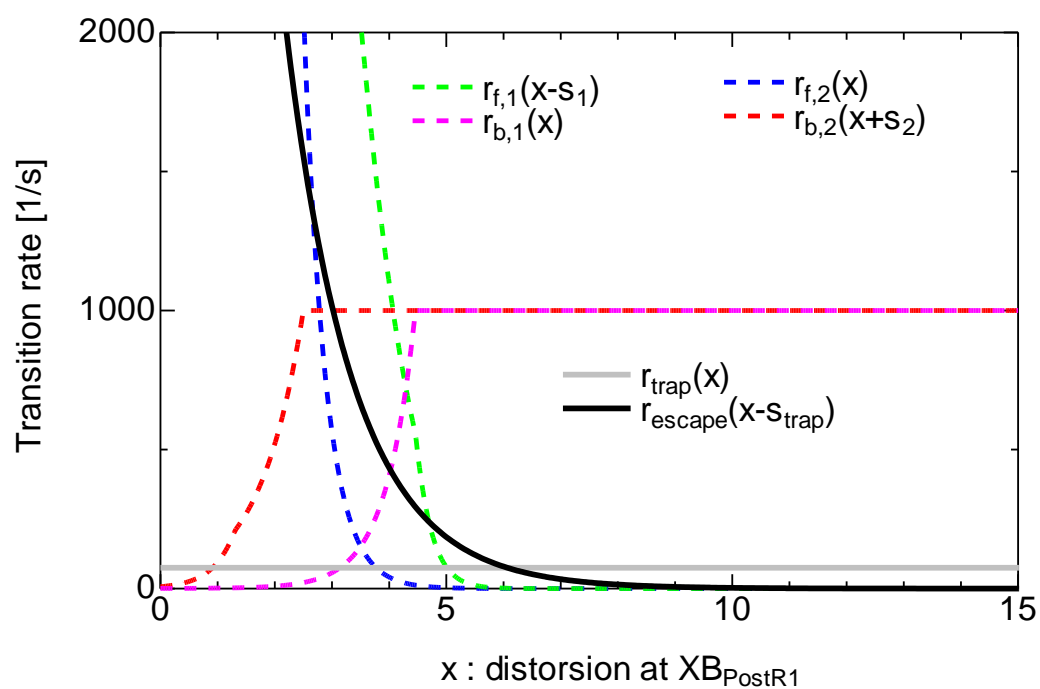

**Figure S2** Rate Constants of the trapping and the escaping as the functions of the distortion at XB<sub>PostR1</sub>
